# Supplementary material for: Systematic Review of Large Language Models for Patient Care: Current Applications and Challenges
Source: bioRxiv or medRxiv preprint supplement (doi:10.1101/2024.03.04.24303733), 2024-03-05
Supplement: Supplementary file [file media-1.pdf]

## Supplemental material

### Section 1. Database search strategy

#### 1. Web of Science

TS=("large language model" OR "LLM" OR "GPT" OR "BERT" OR "transformer model" OR "generative model" OR "generative AI" OR "generative artificial intelligence" OR "generative pre-trained transformer" OR "bidirectional encoder representations from transformers" OR "AI language model") AND TS=(medical practice OR healthcare OR clinical practice OR medicine OR medical treatment OR patient) AND PY=(2022-2023) AND LA=(English) NOT DT=(Review)

#### 2. PubMed

("large language model" OR "LLM" OR "GPT" OR "BERT" OR "transformer model" OR "generative model" OR "generative AI" OR "generative artificial intelligence" OR "generative pre-trained transformer" OR "bidirectional encoder representations from transformers" OR "AI language model") AND (medical practice OR healthcare OR clinical practice OR medicine OR medical treatment OR patient) NOT Review[Publication Type] 2022:2023 [dp] English[la]

#### 3. Embase and Embase Classic

*Limit to (english language and yr="2022 - 2023")*

("large language model" OR "LLM" OR "GPT" OR "BERT" OR "transformer model" OR "generative model" OR "generative AI" OR "generative artificial intelligence" OR "generative pre-trained transformer" OR "bidirectional encoder representations from transformers" OR "AI language model").mp. AND (medical practice OR healthcare OR clinical practice OR medicine OR medical treatment OR patient).mp. NOT "Review".pt.

#### 4. ACM Digital Library

[[Title: "large language model"] OR [Abstract: "large language model"] OR [Title: "llm"] OR [Abstract: "llm"] OR [Title: "gpt"] OR [Abstract: "gpt"] OR [Title: "bert"] OR [Abstract: "bert"] OR [Title: "transformer model"] OR [Abstract: "transformer model"] OR [Title: "generative model"] OR [Abstract: "generative model"] OR [Title: "generative artificial intelligence"] OR [Abstract: "generative artificial intelligence"] OR [Title: "generative pre-trained transformer"] OR [Abstract: "generative pre-trained transformer"] OR [Title: "bidirectional encoder representations from transformers"] OR [Abstract: "bidirectional encoder representations from transformers"] OR [Title: "ai language model"] OR [Abstract: "ai language model"]] AND [[Title: medical practice] OR [Abstract: medical practice] OR [Title: healthcare] OR [Abstract: healthcare] OR [Title: clinical practice] OR [Abstract: clinical practice] OR [Title: medicine] OR [Abstract: medicine] OR [Title: medical treatment] OR [Abstract: medical treatment] OR [Title: patient] OR [Abstract: patient]] AND [E-Publication Date: (01/01/2022 TO 12/31/2023)]

#### 5. IEEE Xplore

*Year range 2022-2023*

("large language model" OR "LLM" OR "GPT" OR "BERT" OR "transformer model" OR "generative model" OR "generative AI" OR "generative artificial intelligence" OR "generative pre-trained transformer" OR "bidirectional encoder representations from transformers" OR "AI language model") AND (medical practice OR healthcare OR clinical practice OR medicine OR medical treatment OR patient)

**Section 2. Excluded studies after full-text screening.**

| Title                                                                                                                                             | Authors, publishing year | Journal            | Included after initial screening | Excluded after full-text screening | Exclusion reason LH                                              | Exclusion reason CR                                                     | Exclusion reason FB | Exclusion reason Table 1                         |
|---------------------------------------------------------------------------------------------------------------------------------------------------|--------------------------|--------------------|----------------------------------|------------------------------------|------------------------------------------------------------------|-------------------------------------------------------------------------|---------------------|--------------------------------------------------|
| 1. Evaluating Risk Progression in Mental Health Chatbots Using Escalating Prompts                                                                 | Heston, 2023             | medRxiv [Preprint] | LH, CR                           | LH, CR                             | aimed at detecting and addressing hazardous psychological states | restricted to psychology, psychosocial support, and behavior assessment | -                   | wrong discipline                                 |
| 2. Chat GPT in Tailoring Individualized Lifestyle-Modification Programs in Metabolic Syndrome: Potentials and Difficulties?                       | Ismail, 2023             | Ann Biomed Eng     | LH, CR                           | LH, CR                             | not original research                                            | not original research                                                   | -                   | wrong study design                               |
| 3. Artificial Intelligence to Improve Patient Understanding of Radiology Report                                                                   | Amin et al., 2023        | Yale J Biol Med    | LH, CR                           | LH, CR                             | narrative review                                                 | not original research                                                   | -                   | wrong study design                               |
| 4. Enhancing Awareness and Self-diagnosis of Obstructive Sleep Apnea Using AI-Powered Chatbots: The Role of ChatGPT in Revolutionizing Healthcare | Bilal et al, 2023        | Ann Biomed Eng     | LH, CR                           | LH, CR                             | not original research                                            | not original research                                                   | -                   | wrong study design                               |
| 5. Deep learning for Arabic healthcare: MedicalBot                                                                                                | Abdelhay et al., 2023    | Soc Netw Anal Min  | LH, CR                           | LH, CR                             | dataset and model development                                    | technical development                                                   | -                   | technological development/performance evaluation |
| 6. Examining Real-World Medication Consultations and Drug-Herb Interactions: ChatGPT Performance Evaluation                                       | Hsu et al., 2023         | JMIR Med Educ      | LH, CR                           | LH, CR                             | focus on pharmacological advice on drug interactions             | investigating drug interactions                                         | -                   | wrong discipline                                 |
| 7. A Large Language Model Screening Tool to Target Patients for Best Practice Alerts: Development and Validation                                  | Savage et al., 2023      | JMIR Med Inform    | LH, CR                           | LH, CR                             | not directed to patients                                         | wrong population                                                        | -                   | wrong population                                 |
| 8. Mind + Machine: ChatGPT as a Basic Clinical Decisions Support Tool                                                                             | Ayoub et al., 2023       | Cureus             | LH, CR                           | LH, CR                             | not directed to patients                                         | wrong population                                                        | -                   | wrong population                                 |

|                                                                                                                                                                 |                             |                             |        |            |                                                                         |                                          |                  |                                          |
|-----------------------------------------------------------------------------------------------------------------------------------------------------------------|-----------------------------|-----------------------------|--------|------------|-------------------------------------------------------------------------|------------------------------------------|------------------|------------------------------------------|
| 9. Personalized Impression Generation for PET Reports Using Large Language Models                                                                               | Tie et al., 2024            | J Med Imaging Health Inform | LH, CR | LH, CR     | not directed to patients                                                | wrong population                         | -                | wrong population                         |
| 10. Chatbots Vs. Human Experts: Evaluating Diagnostic Performance of Chatbots in Uveitis and the Perspectives on AI Adoption in Ophthalmology                   | Rojas-Carabali et al., 2023 | Ocul Immunol Inflamm        | LH, CR | LH, CR     | not directed to patients                                                | wrong population                         | -                | wrong population                         |
| 11. PERSONALIZING HEPATOLOGY: THE ROLE OF CHATBOTS IN TAILORED TREATMENT PLANS IN THE FIELD OF HEPATOLOGY                                                       | Rammohan et al., 2023       | Hepatology                  | LH, CR | LH, CR     | abstract not providing sufficient information                           | insufficient data for thematic synthesis | -                | insufficient data for thematic synthesis |
| 12. Artificial Intelligence for Kidney Stone Spectra Analysis: Using Artificial Intelligence Algorithms for Quality Assurance in the Clinical Laboratory        | Day et al., 2023            | MCP: Digital Health         | LH, CR | LH, CR     | not directed to patients                                                | wrong population                         | -                | wrong population                         |
| 13. Physician and Patient Assessment of Extended Language Model Answers to Rheumatology Patient Inquiries: Doctor versus AI. Comment on the article by Ye et al | Daungsupawong et al., 2023  | Arthritis Rheumatol         | LH     | LH, CR     | commentary                                                              | wrong study design                       | -                | wrong study design                       |
| 14. A Hybrid Model for Depression Detection With Transformer and Bi-directional Long Short-Term Memory                                                          | Zhang et al., 2023          | IEEE BIBM 2023              | CR     | LH, CR, FB | restricted to psychology, psychosocial support, and behavior assessment | wrong population                         | wrong discipline | wrong discipline                         |
| 15. Accurate Detection of Dementia from Speech Transcripts Using RoBERTa Model                                                                                  | Matošević et al., 2022      | MIPRO 2022                  | CR     | LH, CR, FB | restricted to psychology, psychosocial support, and behavior assessment | wrong population                         | wrong discipline | wrong discipline                         |
| 16. Detecting Reddit Users with Depression Using a                                                                                                              | Chen et al., 2023           | arXiv [Preprint]            | CR     | LH, CR, FB | restricted to psychology,                                               | wrong population                         | wrong discipline | wrong discipline                         |

|                                                                                                                                                                  |                      |                                     |        |            |                                                                         |                    |                                                  |                                                  |
|------------------------------------------------------------------------------------------------------------------------------------------------------------------|----------------------|-------------------------------------|--------|------------|-------------------------------------------------------------------------|--------------------|--------------------------------------------------|--------------------------------------------------|
| Hybrid Neural Network SBERT-CNN                                                                                                                                  |                      |                                     |        |            | psychosocial support, and behavior assessment                           |                    |                                                  |                                                  |
| 17. BERT Learns From Electroencephalograms About Parkinson's Disease: Transformer-Based Models for Aid Diagnosis                                                 | Nogales et al., 2023 | IEEE Access                         | CR     | LH, CR     | not direct to patients                                                  | wrong population   | -                                                | wrong population                                 |
| 18. The use of large language models in medicine: proceeding with caution                                                                                        | Deng et al., 2023    | Curr Med Res Opin                   | CR     | LH, CR     | commentary                                                              | wrong study design | -                                                | wrong study design                               |
| 19. Identifying Common Topics in Patient Portal Messages with Unsupervised Natural Language Processing                                                           | Chang et al., 2023   | Int J Radiat. Oncol Biol Phys       | LH     | LH, CR     | not direct to patients                                                  | wrong population   | -                                                | wrong population                                 |
| 20. Democratizing access to research for patients with pancreatic cancer across a diverse health system through natural language processing of radiology reports | King et al., 2023    | J Clin Oncol                        | LH     | LH, CR, FB | technical development                                                   | wrong population   | technological development/performance evaluation | technological development/performance evaluation |
| 21. Comparison of BERT implementations for natural language processing of narrative medical documents                                                            | Turchin et al., 2023 | Inform Med Unlocked                 | LH     | LH, CR, FB | technical development                                                   | wrong population   | technological development/performance evaluation | technological development/performance evaluation |
| 22. Ensembles of BERT for Depression Classification                                                                                                              | Senn et al., 2022    | Annu Int Conf IEEE Eng Med Biol Soc | LH, CR | LH, CR, FB | restricted to psychology, psychosocial support, and behavior assessment | wrong population   | wrong discipline                                 | wrong discipline                                 |
| 23. One LLM is not Enough: Harnessing the Power of Ensemble Learning for Medical Question Answering                                                              | Yang et al., 2023    | medRxiv [Preprint]                  | LH, CR | LH, CR, FB | technical development                                                   | wrong population   | technological development/performance evaluation | technological development/performance evaluation |
| 24. FlauBERT vs. CamemBERT: Understanding patient's                                                                                                              | Blanc et al., 2022   | Artif Intell Med                    | LH     | LH, CR, FB | technical development                                                   | wrong population   | technological development/performance evaluation | technological development/performance evaluation |

|                                                                                                                                                                |                            |                  |        |            |                                                                         |                                          |                                                  |                                                  |
|----------------------------------------------------------------------------------------------------------------------------------------------------------------|----------------------------|------------------|--------|------------|-------------------------------------------------------------------------|------------------------------------------|--------------------------------------------------|--------------------------------------------------|
| answers by a French medical chatbot                                                                                                                            |                            |                  |        |            |                                                                         |                                          |                                                  |                                                  |
| 25. ChatGPT-4 and the Global Burden of Disease Study: Advancing Personalized Healthcare Through Artificial Intelligence in Clinical and Translational Medicine | Temsah et al., 2023        | Cureus           | LH     | LH, CR     | editorial                                                               | not original research                    | -                                                | wrong study design                               |
| 26. Can we use ChatGPT for Mental Health and Substance Use Education? Examining Its Quality and Potential Harms                                                | Spallek et al., 2023       | JMIR Med Educ    | CR     | LH, CR     | restricted to psychology, psychosocial support, and behavior assessment | focus on mental health and substance use | -                                                | wrong discipline                                 |
| 27. Advancing Mental Health Diagnostics: GPT-Based Method for Depression Detection                                                                             | Danner et al., 2023        | SICE2023         | CR     | LH, CR     | restricted to psychology, psychosocial support, and behavior assessment | focus on psychology                      | -                                                | wrong discipline                                 |
| 28. Large language models in bariatric surgery patient support: A transformative approach to patient education and engagement                                  | Samaan et al., 2023        | Clin Obes        | LH, CR | LH, CR     | correspondence                                                          | not original research                    | -                                                | wrong study design                               |
| 29. Application of Large Language Models such as ChatGPT to Support Nutritional Recommendations for Dialysis Patients                                          | Wang et al., 2023          | Kidney Week 2023 | LH, CR | LH, CR     | abstract not providing sufficient information                           | insufficient data for thematic synthesis | -                                                | insufficient data for thematic synthesis         |
| 30. Enabling the Informed Patient Paradigm with Secure and Personalized Medical Question Answering                                                             | Oduro-Afriyie et al., 2023 | ACM-BCB 2023     | LH, CR | LH, CR, FB | technical development                                                   | wrong population                         | technological development/performance evaluation | technological development/performance evaluation |
| 31. Exploring the Potential of Chat GPT in Personalized Obesity Treatment                                                                                      | Arslan, 2023               | Ann Biomed Eng   | LH, CR | LH, CR     | narrative review                                                        | not original research                    | -                                                | wrong study design                               |
| 32. O16 Can sexual health clinicians be replaced by robots? Utility of artificial                                                                              | Taylor et al., 2023        | BASHH 2023       | LH, CR | LH, CR     | abstract not providing sufficient information                           | insufficient data for thematic synthesis | -                                                | insufficient data for thematic synthesis         |

|                                                                                                                                             |                       |                                         |        |        |                                               |                                          |   |                                          |
|---------------------------------------------------------------------------------------------------------------------------------------------|-----------------------|-----------------------------------------|--------|--------|-----------------------------------------------|------------------------------------------|---|------------------------------------------|
| intelligence platforms to give sexual health advice                                                                                         |                       |                                         |        |        |                                               |                                          |   |                                          |
| 33. O-089 Using ChatGPT to answer patient questions about fertility: the quality of information generated by a deep learning language model | Beilby et al., 2023   | 39th Hybrid Annual Meeting of the ESHRE | LH, CR | LH, CR | abstract not providing sufficient information | insufficient data for thematic synthesis | - | insufficient data for thematic synthesis |
| 34. Enhancing Kidney Transplant Care through the Integration of Chatbot                                                                     | Valencia et al., 2023 | Healthcare                              | LH, CR | LH, CR | narrative review                              | not original research                    | - | wrong study design                       |
| 35. Assessing the accuracy and completeness of artificial intelligence language models in providing information on methotrexate use         | Coskun et al., 2023   | Rheumatol Int                           | LH, CR | LH, CR | restricted to pharmaceutical treatment        | focus on MTX                             | - | wrong discipline                         |

**Section 3A. Presence of codes for included studies number 1-45.**

| First order codes             | Second order codes                   | Third order codes | 1. Samaan et al. | 2. Eromosele et al. | 3. Johri et al. | 4. Braga et al. | 5. King et al. | 6. Huang et al. | 7. Hanna et al. | 8. Liu et al. | 9. Samaan et al. | 10. Patnaik et al. | 11. Ali et al. | 12. Suresh et al. | 13. Yeo et al. | 14. Knebel et al. | 15. Zhu et al. | 16. Lahat et al. | 17. Bernstein et al. | 18. Rogasch et al. | 19. Campbell et al. | 20. Currie et al. | 21. Draschl et al. | 22. Alessandri-Bonetti et al. | 23. Capelleras et al. | 24. Coskun et al. | 25. Durairaj et al. | 26. Kianian et al. | 27. Seth et al. | 28. Inojosa et al. | 29. Lyons et al. | 30. Babayigit et al. | 31. Mondal et al. | 32. Kim et al. | 33. Song et al. | 34. Bitar et al. | 35. Zalzal et al. | 36. Chervenak et al. | 37. Bushuven et al. | 38. Jeblick et al. | 39. Samaan et al. | 40. Zhou et al. | 41. Oniani et al. | 42. Hernandez et al. | 43. Kuscu et al. | 44. Biswas et al. | 45. Chiesa-Estomba et al. |   |   |   |   |  |
|-------------------------------|--------------------------------------|-------------------|------------------|---------------------|-----------------|-----------------|----------------|-----------------|-----------------|---------------|------------------|--------------------|----------------|-------------------|----------------|-------------------|----------------|------------------|----------------------|--------------------|---------------------|-------------------|--------------------|-------------------------------|-----------------------|-------------------|---------------------|--------------------|-----------------|--------------------|------------------|----------------------|-------------------|----------------|-----------------|------------------|-------------------|----------------------|---------------------|--------------------|-------------------|-----------------|-------------------|----------------------|------------------|-------------------|---------------------------|---|---|---|---|--|
| <b>Applications</b>           |                                      |                   |                  |                     |                 |                 |                |                 |                 |               |                  |                    |                |                   |                |                   |                |                  |                      |                    |                     |                   |                    |                               |                       |                   |                     |                    |                 |                    |                  |                      |                   |                |                 |                  |                   |                      |                     |                    |                   |                 |                   |                      |                  |                   |                           |   |   |   |   |  |
| Language [other than English] |                                      |                   |                  |                     |                 |                 |                |                 |                 | 1             |                  |                    |                |                   | 1              |                   |                |                  |                      |                    |                     |                   |                    |                               |                       |                   |                     |                    |                 |                    |                  |                      |                   |                |                 |                  |                   |                      |                     |                    |                   |                 |                   |                      |                  |                   |                           |   |   |   |   |  |
|                               | Arab                                 |                   |                  |                     |                 |                 |                |                 |                 |               | 1                |                    |                |                   |                |                   |                |                  |                      |                    |                     |                   |                    |                               |                       |                   |                     |                    |                 |                    |                  |                      |                   |                |                 |                  |                   |                      |                     |                    |                   |                 |                   |                      |                  |                   |                           |   |   |   |   |  |
|                               | Korean                               |                   |                  |                     |                 |                 |                |                 |                 |               |                  |                    |                |                   | 1              |                   |                |                  |                      |                    |                     |                   |                    |                               |                       |                   |                     |                    |                 |                    |                  |                      |                   |                |                 |                  |                   |                      |                     |                    |                   |                 |                   |                      |                  |                   |                           |   |   |   |   |  |
|                               | Mandarin                             |                   |                  |                     |                 |                 |                |                 |                 |               |                  |                    |                |                   | 1              |                   |                |                  |                      |                    |                     |                   |                    |                               |                       |                   |                     |                    |                 |                    |                  |                      |                   |                |                 |                  |                   |                      |                     |                    |                   |                 |                   |                      |                  |                   |                           |   |   |   |   |  |
|                               | Spanish                              |                   |                  |                     |                 |                 |                |                 |                 |               |                  |                    |                |                   | 1              |                   |                |                  |                      |                    |                     |                   |                    |                               |                       |                   |                     |                    |                 |                    |                  |                      |                   |                |                 |                  |                   |                      |                     |                    |                   |                 |                   |                      |                  |                   |                           |   |   |   |   |  |
| Discipline                    |                                      |                   | 1                | 1                   | 1               | 1               | 1              | 1               | 1               | 1             | 1                | 1                  | 1              | 1                 | 1              | 1                 | 1              | 1                | 1                    | 1                  | 1                   | 1                 | 1                  | 1                             | 1                     | 1                 | 1                   | 1                  | 1               | 1                  | 1                | 1                    | 1                 | 1              | 1               | 1                | 1                 | 1                    | 1                   | 1                  | 1                 | 1               | 1                 | 1                    | 1                | 1                 | 1                         | 1 | 1 | 1 | 1 |  |
|                               | Anesthesiology                       |                   |                  |                     |                 |                 |                |                 |                 |               |                  | 1                  |                |                   |                |                   |                |                  |                      |                    |                     |                   |                    |                               |                       |                   |                     |                    |                 |                    |                  |                      |                   |                |                 |                  |                   |                      |                     |                    |                   |                 |                   |                      |                  |                   |                           |   |   |   |   |  |
|                               | Cardiology                           |                   |                  | 1                   |                 |                 |                |                 | 1               |               |                  |                    |                |                   |                |                   |                |                  |                      |                    |                     |                   |                    |                               |                       |                   |                     |                    |                 |                    |                  |                      |                   |                |                 |                  |                   |                      |                     |                    |                   |                 |                   |                      |                  |                   |                           |   |   |   |   |  |
|                               | Dentistry                            |                   |                  |                     |                 |                 |                |                 |                 |               |                  |                    |                |                   |                |                   |                |                  |                      |                    |                     |                   |                    |                               |                       |                   |                     | 1                  |                 |                    |                  |                      |                   |                |                 |                  |                   |                      |                     |                    |                   |                 |                   |                      |                  |                   |                           |   |   |   |   |  |
|                               | Dermatology                          |                   |                  |                     | 1               |                 |                |                 |                 |               |                  |                    |                |                   |                |                   |                |                  |                      |                    |                     |                   |                    |                               |                       |                   |                     |                    |                 |                    |                  |                      |                   |                |                 |                  |                   |                      |                     |                    |                   |                 |                   |                      |                  |                   |                           |   |   |   |   |  |
|                               | Emergency Medicine                   |                   |                  |                     |                 |                 |                |                 |                 |               |                  |                    |                |                   |                |                   |                |                  |                      |                    |                     |                   |                    |                               |                       |                   |                     |                    |                 |                    |                  |                      |                   |                |                 |                  |                   |                      |                     |                    |                   |                 |                   |                      |                  |                   |                           |   |   |   |   |  |
|                               | Endocrinology                        |                   |                  |                     |                 |                 |                |                 |                 |               |                  |                    |                |                   |                |                   |                |                  |                      |                    |                     |                   |                    |                               |                       |                   |                     |                    |                 |                    |                  |                      |                   |                |                 |                  |                   |                      |                     |                    |                   |                 |                   |                      |                  |                   |                           |   |   |   |   |  |
|                               | Gastroenterology                     |                   | 1                |                     |                 |                 |                |                 |                 |               | 1                |                    | 1              |                   | 1              |                   |                | 1                |                      |                    |                     |                   |                    |                               |                       |                   |                     |                    |                 |                    |                  |                      |                   |                |                 |                  |                   |                      |                     |                    |                   |                 |                   |                      |                  |                   |                           |   |   |   |   |  |
|                               | General Surgery                      |                   |                  |                     |                 |                 |                |                 |                 |               |                  |                    |                |                   |                |                   |                |                  |                      |                    |                     |                   |                    |                               |                       |                   |                     |                    |                 |                    |                  |                      |                   |                |                 |                  |                   |                      |                     |                    |                   |                 |                   |                      |                  |                   |                           |   |   |   |   |  |
|                               | Gynecology                           |                   |                  |                     |                 |                 |                |                 |                 |               |                  |                    |                |                   |                |                   |                |                  |                      |                    |                     |                   |                    |                               |                       |                   |                     |                    |                 |                    |                  |                      |                   |                |                 |                  |                   |                      |                     |                    |                   |                 |                   |                      |                  |                   |                           |   |   |   |   |  |
|                               | Hand Surgery                         |                   |                  |                     |                 |                 |                |                 |                 |               |                  |                    |                |                   |                |                   |                |                  |                      |                    |                     |                   |                    |                               |                       |                   |                     |                    |                 |                    |                  |                      |                   |                |                 |                  |                   |                      |                     |                    |                   |                 |                   |                      |                  |                   |                           |   |   |   |   |  |
|                               | Head and Neck Surgery/Otolaryngology |                   |                  |                     |                 |                 |                |                 |                 |               |                  |                    |                | 1                 |                |                   |                |                  |                      |                    |                     |                   |                    |                               |                       |                   |                     |                    |                 |                    |                  |                      |                   |                |                 |                  |                   |                      |                     |                    |                   |                 |                   |                      |                  |                   |                           |   |   |   |   |  |
|                               | Infectious Disease                   |                   |                  |                     |                 |                 |                |                 | 1               |               |                  |                    |                |                   |                |                   |                |                  |                      |                    |                     |                   |                    |                               |                       |                   |                     |                    |                 |                    |                  |                      |                   |                |                 |                  |                   |                      |                     |                    |                   |                 |                   |                      |                  |                   |                           |   |   |   |   |  |
|                               | Nephrology                           |                   |                  |                     |                 |                 |                |                 |                 |               |                  |                    |                |                   |                |                   |                |                  |                      |                    |                     |                   |                    |                               |                       |                   |                     |                    |                 |                    |                  |                      |                   |                |                 |                  |                   |                      |                     |                    |                   |                 |                   |                      |                  |                   |                           |   |   |   |   |  |
|                               | Neurology                            |                   |                  |                     |                 |                 |                |                 |                 |               |                  |                    |                |                   |                |                   |                |                  |                      |                    |                     |                   |                    |                               |                       |                   |                     |                    |                 |                    |                  |                      |                   |                |                 |                  |                   |                      |                     |                    |                   |                 |                   |                      |                  |                   |                           |   |   |   |   |  |
|                               | Neurosurgery                         |                   |                  |                     |                 |                 |                |                 |                 |               |                  |                    |                |                   |                |                   |                |                  |                      |                    |                     |                   |                    |                               |                       |                   |                     |                    |                 |                    |                  |                      |                   |                |                 |                  |                   |                      |                     |                    |                   |                 |                   |                      |                  |                   |                           |   |   |   |   |  |
|                               | Nuclear Medicine                     |                   |                  |                     |                 |                 |                |                 |                 |               |                  |                    |                |                   |                |                   |                |                  |                      |                    |                     |                   |                    |                               |                       |                   |                     |                    |                 |                    |                  |                      |                   |                |                 |                  |                   |                      |                     |                    |                   |                 |                   |                      |                  |                   |                           |   |   |   |   |  |
|                               | Oncology                             |                   |                  |                     |                 |                 |                |                 |                 |               |                  |                    |                |                   |                |                   |                |                  |                      |                    |                     |                   |                    |                               |                       |                   |                     |                    |                 |                    |                  |                      |                   |                |                 |                  |                   |                      |                     |                    |                   |                 |                   |                      |                  |                   |                           |   |   |   |   |  |
|                               | Ophthalmology                        |                   |                  |                     |                 |                 |                |                 |                 |               |                  |                    |                |                   | 1              |                   |                | 1                |                      |                    |                     |                   |                    |                               |                       |                   |                     |                    |                 |                    |                  |                      |                   |                |                 |                  |                   |                      |                     |                    |                   |                 |                   |                      |                  |                   |                           |   |   |   |   |  |
